# Supplementary material for: Bacon, Brownie, or Broccoli? Beliefs about Stress-Relieving Foods and Their Relationship to Orthorexia Nervosa
Source: MDPI journal article supplement (doi:10.3390/nu14183673), 2022-09-06
Supplement: s1 [file s1]

**Table S5 Final Principal Component Analysis**

Obliquely rotated factor loadings for 19 food items

| Principal Component Analysis |             |             |             |
|------------------------------|-------------|-------------|-------------|
| Food item                    | Factor 1    | Factor 2    | Factor 3    |
| eggs                         | <b>0.81</b> | 0.10        | 0.23        |
| meat                         | <b>0.75</b> | 0.22        | -0.06       |
| milk products                | <b>0.66</b> | 0.23        | 0.22        |
| butter                       | <b>0.60</b> | 0.35        | 0.20        |
| fish                         | <b>0.59</b> | -0.03       | 0.37        |
| cheese                       | <b>0.52</b> | 0.29        | 0.30        |
| cake                         | 0.02        | <b>0.79</b> | 0.11        |
| sweets                       | 0.04        | <b>0.79</b> | 0.03        |
| salty nibbles                | 0.12        | <b>0.72</b> | 0.14        |
| sweet spread                 | 0.35        | <b>0.63</b> | 0.11        |
| ready meals                  | 0.24        | <b>0.58</b> | -0.02       |
| cereals                      | 0.31        | <b>0.51</b> | 0.22        |
| vegetables                   | 0.09        | 0.01        | <b>0.85</b> |
| soups                        | 0.06        | 0.16        | <b>0.67</b> |
| salad                        | 0.33        | -0.06       | <b>0.65</b> |
| fruits                       | 0.25        | 0.13        | <b>0.64</b> |
| nuts                         | -0.02       | 0.11        | <b>0.63</b> |
| legumes                      | 0.35        | 0.03        | <b>0.62</b> |
| couscous                     | 0.19        | 0.16        | <b>0.55</b> |
| eigen values                 | 3.26        | 3.18        | 3.55        |
| % of variance                | 0.17        | 0.17        | 0.19        |

Mean item complexity = 1.4

Test of the hypothesis that 3 components are sufficient.

The root mean square of the residuals (RMSR) is 0.07 with  
the empirical chi square 256.62 with prob < 1.8e-12

Fit based upon off diagonal values = 0.95

Note. food items with loadings greater or equal 0.4 are displayed in bold type
