# Supplementary material for: Bacon, Brownie, or Broccoli? Beliefs about Stress-Relieving Foods and Their Relationship to Orthorexia Nervosa
Source: MDPI journal article supplement (doi:10.3390/nu14183673), 2022-09-06
Supplement: s1 [file s1]

**Table S4 First Principal Component Analysis**

Obliquely rotated factor loadings for 23 food items

| Principal Components Analysis |             |             |             |
|-------------------------------|-------------|-------------|-------------|
| food item                     | Factor 1    | Factor 2    | Factor 3    |
| bread                         | <b>0.53</b> | <b>0.40</b> | <b>0.27</b> |
| pasta                         | <b>0.39</b> | <b>0.45</b> | <b>0.36</b> |
| potatoes                      | <b>0.48</b> | <b>0.11</b> | <b>0.48</b> |
| rice                          | <b>0.46</b> | <b>0.19</b> | <b>0.46</b> |
| butter                        | 0.61        | 0.34        | 0.18        |
| couscous                      | 0.21        | 0.18        | 0.54        |
| legumes                       | 0.37        | 0.02        | 0.62        |
| eggs                          | 0.79        | 0.09        | 0.21        |
| ready meals                   | 0.28        | 0.57        | -0.01       |
| fish                          | 0.55        | -0.05       | 0.36        |
| meat                          | 0.75        | 0.21        | -0.07       |
| vegetables                    | 0.08        | 0.02        | 0.84        |
| cheese                        | 0.49        | 0.31        | 0.27        |
| salty nibbles                 | 0.13        | 0.71        | 0.13        |
| cake                          | 0.03        | 0.79        | 0.11        |
| milk products                 | 0.64        | 0.22        | 0.20        |
| cereals                       | 0.35        | 0.49        | 0.23        |
| nuts                          | -0.01       | 0.10        | 0.62        |
| fruits                        | 0.22        | 0.14        | 0.62        |
| salad                         | 0.34        | -0.05       | 0.64        |
| sweet spread                  | 0.33        | 0.63        | 0.09        |
| soups                         | 0.06        | 0.15        | 0.67        |
| sweets                        | 0.00        | 0.79        | 0.00        |
| eigen values                  | 4.09        | 3.53        | 4.07        |
| % of variance                 | 0.18        | 0.15        | 0.18        |

Mean item complexity = 1.6

Test of the hypothesis that 3 components are sufficient.

The root mean square of the residuals (RMSR) is 0.06 with the empirical chi square 364.68 with prob < 1.5e-13

Fit based upon off diagonal values = 0.96

food items with loadings greater or equal 0.4 on more than one factor are displayed in bold type
